# Supplementary material for: The Role of Cellular Prion Protein in Promoting Stemness and Differentiation in Cancer
Source: PubMed Central journal article supplement (PMC7825291; doi:10.3390/cancers13020170), 2021-01-06
Supplement: cancers-13-00170-s001.pdf [file cancers-13-00170-s001.pdf]

# Supplementary Materials: The Role of Cellular Prion Protein in Promoting Stemness and Differentiation in Cancer

Larisa Ryskalin, Francesca Biagioni, Carla L. Busceti, Maria A. Giambelluca, Luca Morelli, Alessandro Frati and Francesco Fornai

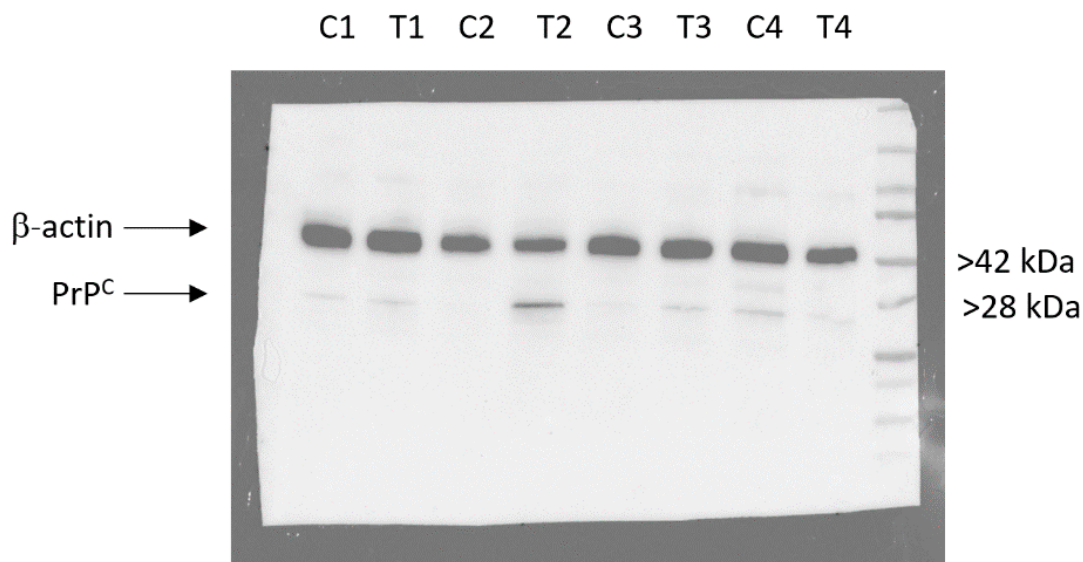

**Figure 1.** Original western blot image of Figure 2B, reporting immunoblot for PrP<sup>C</sup> and the house keeping protein  $\beta$ -actin in control (C) and PDAC (T) tissues from different surgically resected specimens of PDAC.

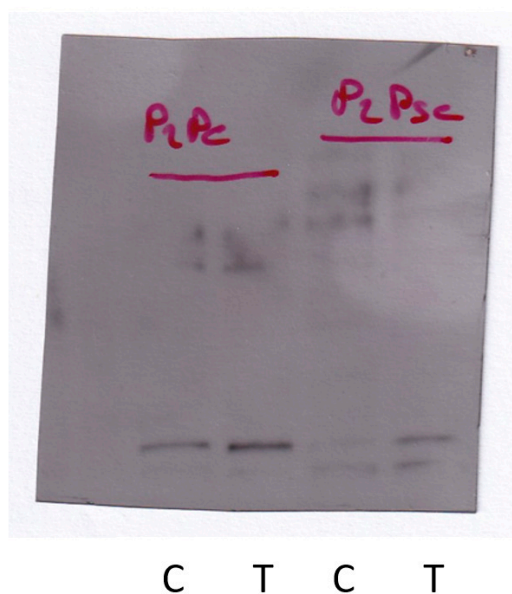

**Figure 2.** Original western blot image of Figure 2C, comparing scrapie prion protein (PrP<sup>Sc</sup>) and PrP<sup>C</sup> (with or without proteinase K) in control (C) and PDAC (T) tissues.

**Table 1.** Densitometric analysis of PrP<sup>C</sup> expression in control (C) and PDAC (T) tissues.

| <b>Sample</b> | <b>PrP<sup>C</sup></b> | <b><math>\beta</math>-actin</b> | <b>PrP<sup>C</sup>/<math>\beta</math>-actin</b> |
|---------------|------------------------|---------------------------------|-------------------------------------------------|
| C 1           | 932.65                 | 31,773.81                       | 0.029                                           |
| T 1           | 1911.91                | 32,883.96                       | 0.058                                           |
| C 2           | 68.95                  | 24,268.30                       | 0.003                                           |
| T 2           | 11,492.14              | 21,705.64                       | 0.529                                           |
| C 3           | 790.34                 | 27,486.59                       | 0.029                                           |
| T 3           | 1898.03                | 26,837.94                       | 0.071                                           |
| C 4           | 2963.18                | 29,874.35                       | 0.099                                           |
| T 4           | 860.75                 | 22,088.16                       | 0.039                                           |

**Table 2.** Densitometric analysis of PrP<sup>C</sup> and PrP<sup>Sc</sup> expression in control (C) and PDAC (T) tissues.

| <b>Protein</b>    | <b>Control</b> | <b>Tumor</b> | <b>Ratio T/C</b> |
|-------------------|----------------|--------------|------------------|
| PrP <sup>C</sup>  | 34.860         | 42.270       | 1.212            |
| PrP <sup>Sc</sup> | 19.800         | 44.833       | 2.264            |
